# Supplementary material
Source: PubMed Central journal article supplement (PMC3808646)
Supplement: 1308632110_sapp.pdf [file 1308632110_sapp.pdf]

## **Supporting information**

### ***Studies contributing data and bacterial isolates***

Data and isolates from several sequential studies were combined for the purposes of this investigation <sup>1-3</sup>. All bacterial isolates used in this study are shown in Table S1. All enrolled patients in the studies were treated as inpatients, were under the age of ten years, and there were no fatalities. The primary study (23 isolates, coded MS) was conducted at the HTD from January 1995 to August 1996. The enrollment and clinical observations for this randomized controlled trial (RCT) are as described previously <sup>3</sup>. Briefly, children that were aged >3 months and < 10 years, admitted to HTD with fever and bloody or mucoid diarrhea (bloody/mucoid diarrhea was defined >3 loose stools with obvious blood/mucus) for <5 days were eligible for enrolment. The second study (36 isolates, coded DE) was conducted at the HTD between March 2000 and December 2002. This study was a clinical and microbiological investigation of the etiology of diarrhea in the pediatric population admitted to the HTD <sup>3</sup>. Briefly, children who were aged >3 months and <10 years, admitted to HTD with acute diarrhea (defined as three or more loose stools or at least one bloody loose stool within a 24-hour period) for <3 days were eligible for enrollment. The third study was a RCT conducted at HTD between June 2006 and December 2008 (54 isolates, coded EG). This RCT compared ciprofloxacin and gatifloxacin for treating acute dysentery in Vietnamese children (controlled trials number ISRCTN55945881) <sup>1</sup>. The inclusion criteria for the RCT were as previously described and equivalent to those used in the primary study. The fourth study was a clinical and etiological investigation of diarrhea infections in HCMC (55 isolates, numerical codes in Table S1). All children who were

under 5 years of age with acute diarrheal disease admitted to the Gastrointestinal Department of CH1, CH2 and HTD between May 2009 and April 2010 in HCMC were eligible for participation <sup>4</sup>. Diarrhea was defined as three or more loose stools or at least one bloody loose stool within a 24-hour period. Children were excluded if they did not live within HCMC, had been pre-treated with antimicrobials, had multiple complications unrelated to diarrheal disease or did not provide informed consent. Bacterial isolates from Hue and Khanh Hoa were donated by these institutions for the purposes of this study and originated from the diagnostic microbiology laboratories; samples were collected as part of routine clinical care for diagnostic purposes. Also included in the study were the previously sequenced genomes of 19 isolates collected at the Khanh Hoa general hospital and community clinics during a diarrhea surveillance study conducted during 2001-2003 <sup>5</sup>.

### ***Detection of plasmids and resistance genes***

To identify likely plasmids within the accessory genome, we performed a BLAST search of each accessory gene in each of the *S. sonnei* assemblies and generated a correlation table containing entries for each pair of genes co-occurring within 1000 bp of each other in a contig, weighted by the number of isolates in which this co-occurrence was detected.

BioLayout 3D was used to infer a network from this data, and thereby identify groups of genes that likely occur in the same replicon. The RAST annotation of the genes was then used to determine whether each replicon was likely to be of plasmid, phage or other origin.

Resistance genes were identified as previously described <sup>6</sup>. Briefly, annotations of reference genomes or novel sequences were scanned for antimicrobial- or resistance-related

keywords. The presence of these genes in each isolate was extracted from the gene content data described above and compared to resistance phenotypes. For each isolate, a genetic basis for every resistance phenotype could be identified, in the form of a resistance gene or *gyrA* mutation (Table S1).

### ***ESBL plasmids***

Two large (> 70 kbp) plasmids were identified encoding extended spectrum beta-lactamase (ESBL) CTX-M genes. One of these was pEG356, a 71 kbp plasmid harbouring CTX-M-14, originally identified in a third-generation cephalosporin resistant *S. sonnei* from HCMC in 2001<sup>7</sup>. Here, pEG356 was detected in one additional isolate from HCMC, one isolate from Hue and multiple strains from KH spanning both of the KH clones (KH1, N=4/11; KH2, N=11/16; see Fig. S6A, Table S1). The detection of pEG356 in different subclones within the same geographical location indicates that the genetically distinct *S. sonnei* clones co-circulating in KH have had access to a common gene pool.

We also detected an unrelated and novel ESBL encoding plasmid pKHSB1, 100 kbp in size, bearing a CTX-M-15 gene (submitted to GenBank under accession TBA). This was widespread among HCMC *S. sonnei* isolates, and became ubiquitous after 2006 (Fig. 2, Fig. S5a). pKHSB1 is an IncI1 plasmid and is nearly identical to pEK204, isolated from a uropathogenic *E. coli* strain in the United Kingdom (7 SNPs; Fig. S6a)<sup>8</sup>. All the plasmids share an insertion of Tn3 carrying the *bla*<sub>TEM-1</sub> gene into the same site within the plasmid backbone (Fig. S6b). However, pEK204 carries a CTX-M-3 gene, inserted in a different position within Tn3 to that of the CTX-M-15 gene in pKHSB1 (Fig. S6b). We also

identified a very similar plasmid in a 2003 Korean *S. sonnei* isolate within our previously sequenced global collection <sup>6</sup>, which is closer to pKHSB1 than pEK204 (3 SNPs; Fig. S6a) and shares the same Tn3/*bla*<sub>TEM-1</sub> insertion but does not contain a CTX-M insertion. This confirms that the HCMC *S. sonnei* plasmid pKHSB1 has not been transferred directly from uropathogenic *E. coli* ST131, but descends from an IncI1 backbone that has been circulating in Asian *S. sonnei* for some time and has only recently acquired ESBL functionality, in a separate event from the ESBL acquisition occurring in pEK204.

### ***Summary of colicin plasmid investigations***

Within the VN clone we detected two small plasmids, pDPT1 and pDPT2, each encoding a colicin and a corresponding immunity protein (Fig. 3). Colicins are bacteriocidal toxins, produced by Gram-negative organisms to kill susceptible organisms, reducing potential competition for space and nutrients within their immediate environment <sup>9</sup>. Here, pDPT1, encoding an E5 type colicin and immunity gene, became fixed during the first selective sweep and has been universally maintained since (Fig. S1b). Plasmid pDPT2, encoding a JS-type colicin and immunity protein, concurrently entered the population with pDPT1, but has been sporadically lost following the second selective sweep and was almost undetectable after the fourth selective sweep (Fig. S1b, Fig. S5a).

To investigate the functional significance of the two colicin plasmids, we performed over 600 assays to assess colicin activity across 27 bacterial isolates, summarized in Fig 3. Detailed methods are provided below. Representative *S. sonnei* from each sweep, and *E. coli* isolates, were exposed to colicin extract from wild type isolates and laboratory

constructed strains containing the E5 operon (pDPT1), the JS operon (pDPT2) or both. Under experimental conditions, the JS colicin extract did not show any detectable inhibition of bacterial growth in any organism tested (Fig. 3). However, colicin extracts from wild-type *S. sonnei* carrying pDPT1 or pDPT1+pDPT2, and from *S. sonnei* or *E. coli* with pDPT1 or pDPT1+pDPT2 introduced in the laboratory, consistently demonstrated growth inhibition against hypothesized “non-immune” *E. coli* and *S. sonnei*, but not those containing pDPT1 (Fig. 3). These data demonstrate that the E5 colicin plasmid pDPT1, identified through sequencing, provides a competitive advantage over non-pDPT1 containing *S. sonnei* and *E. coli*. Given that the introduction and maintenance of the pDPT1 coincides precisely with the first selective sweep (Fig. 2, Fig. S1), it is likely that the activity of this colicin was a driver of the first selective sweep in Vietnamese *S. sonnei* and is linked to the increased contribution of *S. sonnei* to the overall dysentery burden in Vietnam.

### ***Assembly of colicin plasmids***

The colicin genes of plasmid pDPT1 were first identified during the gene content analysis described above, as a set of genes frequently detected in the VN clade, including three with >99% nucleotide sequence identity to the plasmid ColE5-099 colicin E5, immunity and lysis genes (X15857) <sup>10</sup> and one with 99% identity to the *mobA* plasmid mobilization gene from plasmid pO26-S4 (FJ004638). Searching for these genes in *de novo* assembled contigs by blastn search revealed these genes were adjacent to each other, usually on a single contig spanning ~6.8 kbp. Alignment of these colicin E5-containing contigs from different *S. sonnei* genomes revealed that they shared the same content, but different start and end

points, consistent with an identical circular molecule of 6,826 bp in each isolate. The consensus sequence was annotated and submitted to GenBank as plasmid pDPT1 (accession HF565446) (Fig. 3).

The colicin genes of pDPT2 were first identified as a set of genes frequently detected in the VN clade, with homology to Js colicin, immunity and lysis genes. Blast search of the sequences in the novel contig sets identified all three genes together in contigs ~5 kbp in size. Alignment of these contigs confirmed their similarity to each other and overlapping ends indicative of circular structure. A blastn search of the NCBI database identified a very similar plasmid (>99% nucleotide sequence identity across the full length of sequence) to *E. coli* plasmid pMG828-3 7 (DQ995353) and *S. sonnei* plasmid pScol7 (AB062753) which encode colicin type 7 (Js). pDPT2 was nearly identical to pMG828-3, hence the annotation from pMG828-3 was transferred to the consensus sequence for pDPT2, which was submitted to GenBank (accession HF565445) (Fig. 3).

### ***Details of colicin assays***

A selection of twenty *S. sonnei* spanning the selective sweeps, and two laboratory *E. coli* strains (DH5 $\alpha$  and K12) were screened by PCR amplification for the presence of pDPT1 (E5) and pDPT2 (JS). All strains (containing either no colicin operon, E5, JS or E5 + JS) were exposed to crude colicin extract from wild type and laboratory-constructed strains of *S. sonnei* or *E. coli* containing pDPT1, pDPT2 or both, activity was determined by measuring growth inhibition (Fig. 3).

To construct tractable plasmids containing the E5 and JS operons, DNA fragments containing each of these operons were amplified using Biotaq polymerase (Bioline, UK) and ligated with the kanamycin resistance cassette from pDK4 (accession number: AY048743.1) and the chloramphenicol resistance cassette from pKD3 (accession number: AY048742.1), respectively. The generated plasmids were designated as pDPT3(E5) and pDPT4(JS). Plasmids were visualized by agarose gel electrophoresis and purified. Strains *E. coli* DH5 $\alpha$  and *S. sonnei* MS48 (without colicin plasmids) were electrotransformed with pDPT3 and pDPT4 using a Gene pulser II electroporation system (Biorad, USA). Transformants were selected on LB media supplemented with 100 $\mu$ g/ml kanamycin, 100 $\mu$ g/ml chloramphenicol or both. All potential transformants were screened by PCR amplification and sequencing to ensure the presence of the plasmid(s) (Fig. 3).

To extract crude colicin, 100 $\mu$ l of hypothetically colicinogenic and non-colicinogenic stationary phase bacteria were inoculated into 10ml LB broth and incubated at 37 $^{\circ}$ C with aeration. After three hours, cultures were inoculated with 8  $\mu$ l of mitomycin C (final concentration 0.4  $\mu$ l/ml) or 8  $\mu$ l of sterile LB broth. Bacterial cultures were incubated at 37 $^{\circ}$ C with aeration for an additional two hours. Cultures were pelleted by centrifugation, the supernatant was harvested, sonicated and filter sterilized. Crude colicin extracts were stored -20 $^{\circ}$ C until required for experimentation. Colicin activity was assessed by, inoculating 100 $\mu$ l of stationary phase bacterial isolate into TOP agar (0.7 % LB) onto LB agar plates. After equilibration at ambient temperature, 10 $\mu$ l of each of the colicin extracts was inoculated in a grid formation (4 x4) onto the LB plate. Again, the LB plates equilibrated at ambient temperature and incubated at 37 $^{\circ}$ C overnight. Colicin activity was

assessed by calculated the size of the zone of growth inhibition in comparison to a negative control (phosphate buffered saline). Zone sizes we scored by diameter 0; no zone, 1, <2mm and 2, >2mm. All colicin assays were performed in triplicate and recorded independently by two individuals.



## Supporting Figures

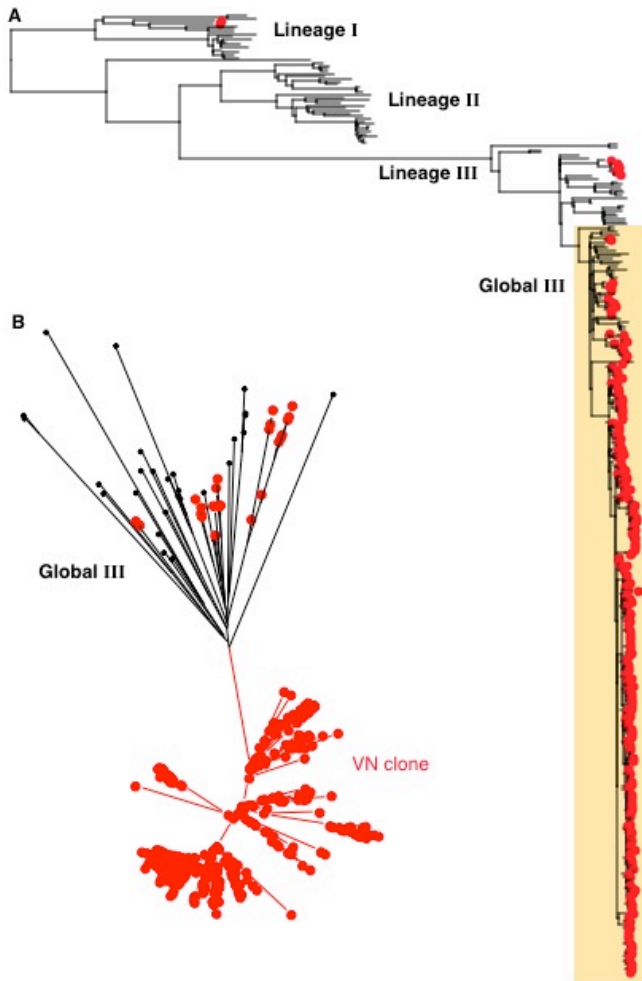

**Figure S1. The VN clone of global *Shigella sonnei***

Maximum likelihood trees based on genome-wide chromosomal SNPs. Vietnamese isolates are highlighted in red. (A) Phylogenetic tree for the 263 Vietnamese *S. sonnei* sequenced in this study plus 113 non-Vietnamese *S. sonnei* sequenced previously (total N=376). (B) Phylogenetic tree for the Global III clade, which includes all but 8 of the Vietnamese *S. sonnei*. The Vietnam-specific VN clone, is labeled.

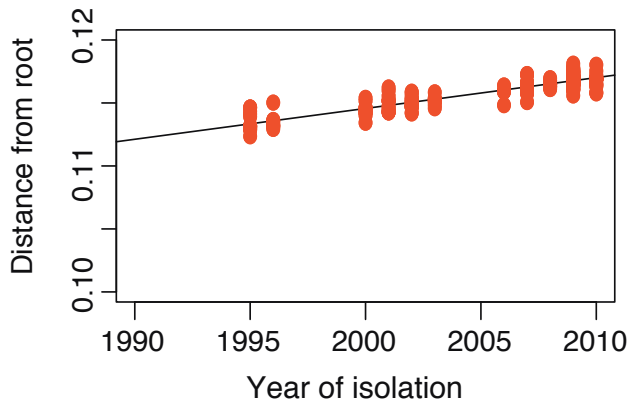

**Figure S2. The mutation rate of the *Shigella sonnei* VN clone**

Branch lengths (from maximum likelihood phylogenetic tree shown in Fig. 1) vs date of isolation for Vietnamese *S. sonnei*. Pearson correlation coefficient = 0.92,  $p < 0.0001$ .

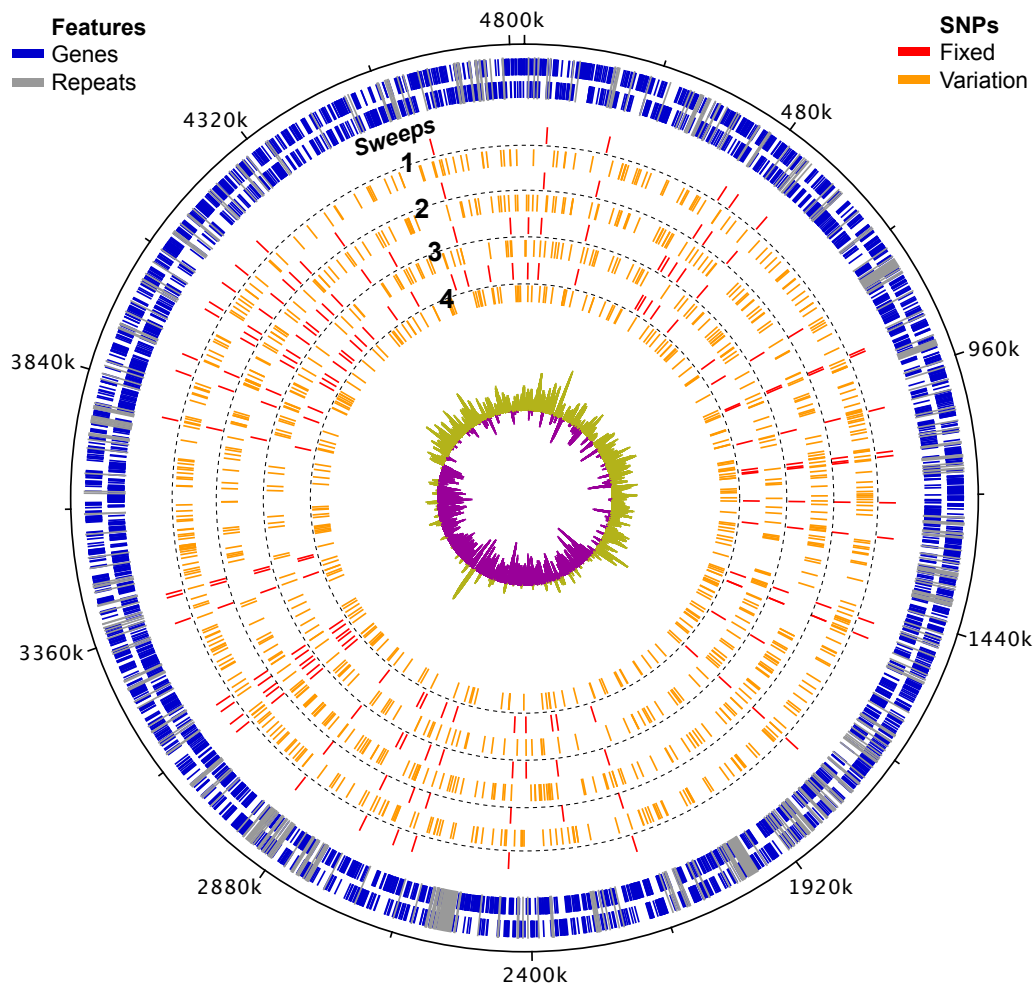

**Figure S3. SNPs identified in the *Shigella sonnei* chromosome following the emergence of the VN clone.** Circular map of the Ss046 reference chromosome, coordinates are given outside the circle, where k represents 1,000 bp. Outer rings indicate genes (blue) annotated on the forward and reverse strands, and repetitive or prophage regions (grey) excluded from SNP calling. Remaining rings represent SNPs that were fixed by (red) or arose following (orange) the four sweeps marked in Fig. 2. G+C skew is shown in the centre.

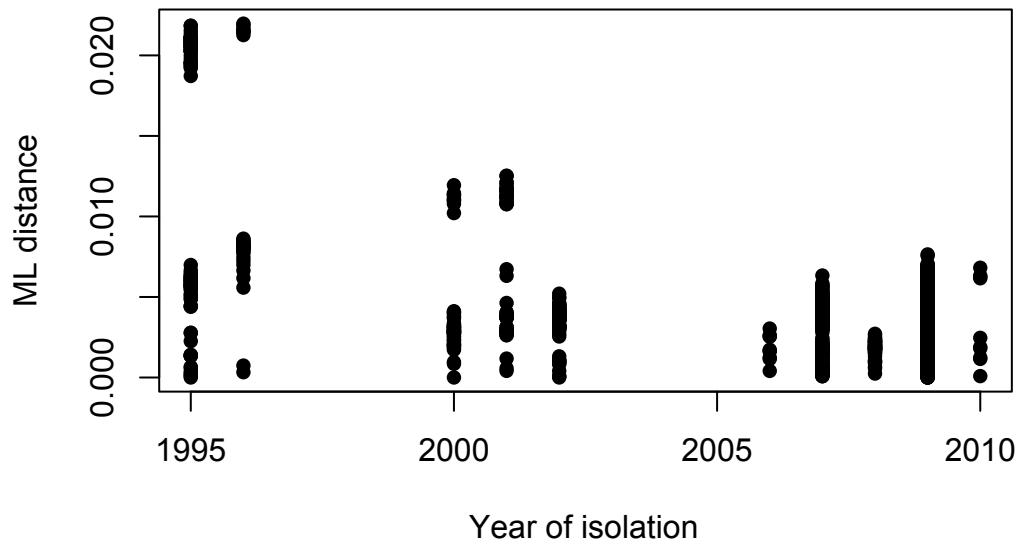

**Figure S4. Genetic diversity within the *Shigella sonnei* VN clone**

Declining genetic diversity within the HCMC *S. sonnei* population during the 16-year period of study. Pairwise genetic distances are based on the maximum likelihood phylogenetic tree shown in Figure 1, year indicates year of isolation.

**a**

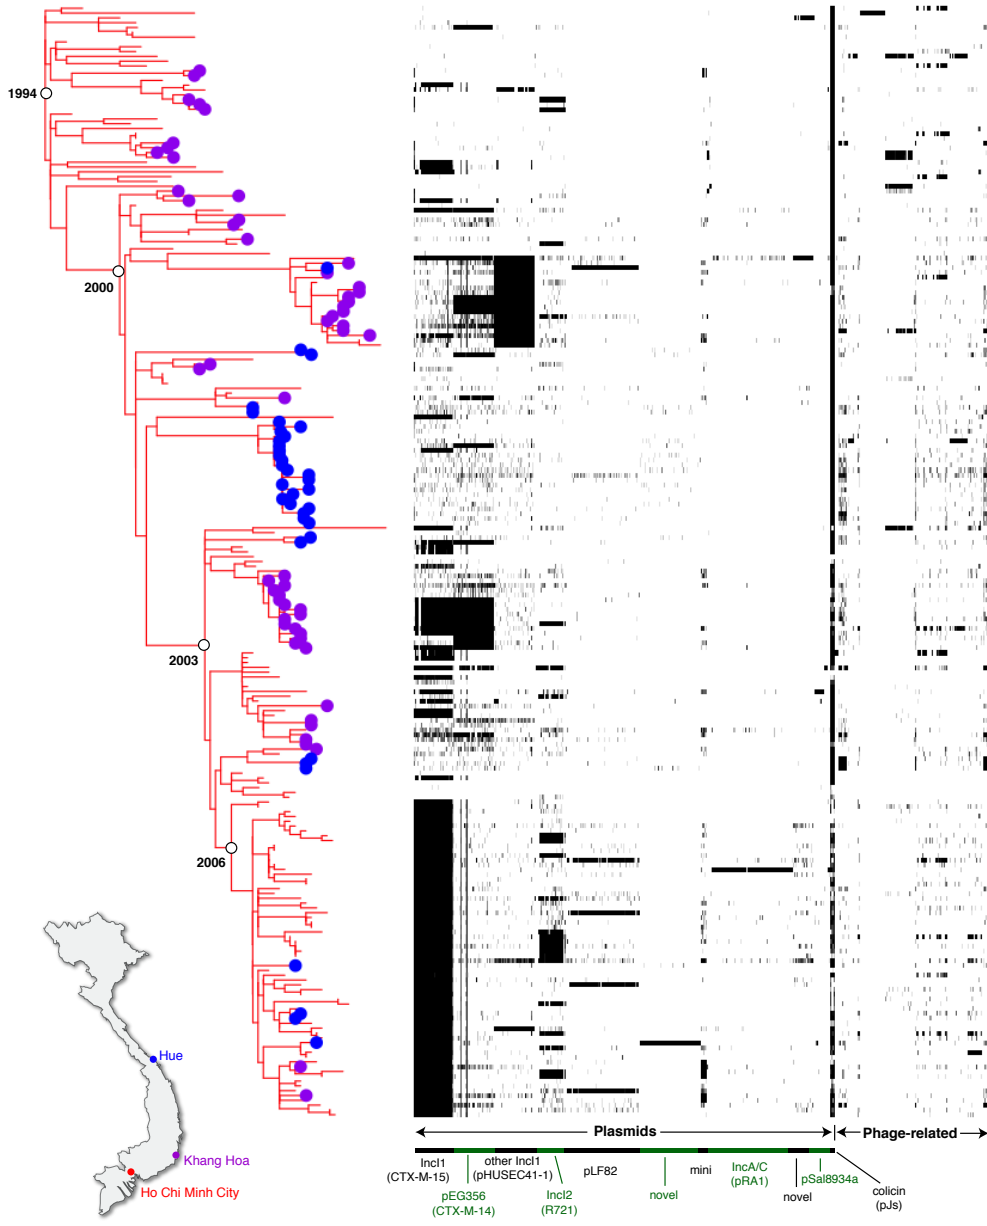

**b**

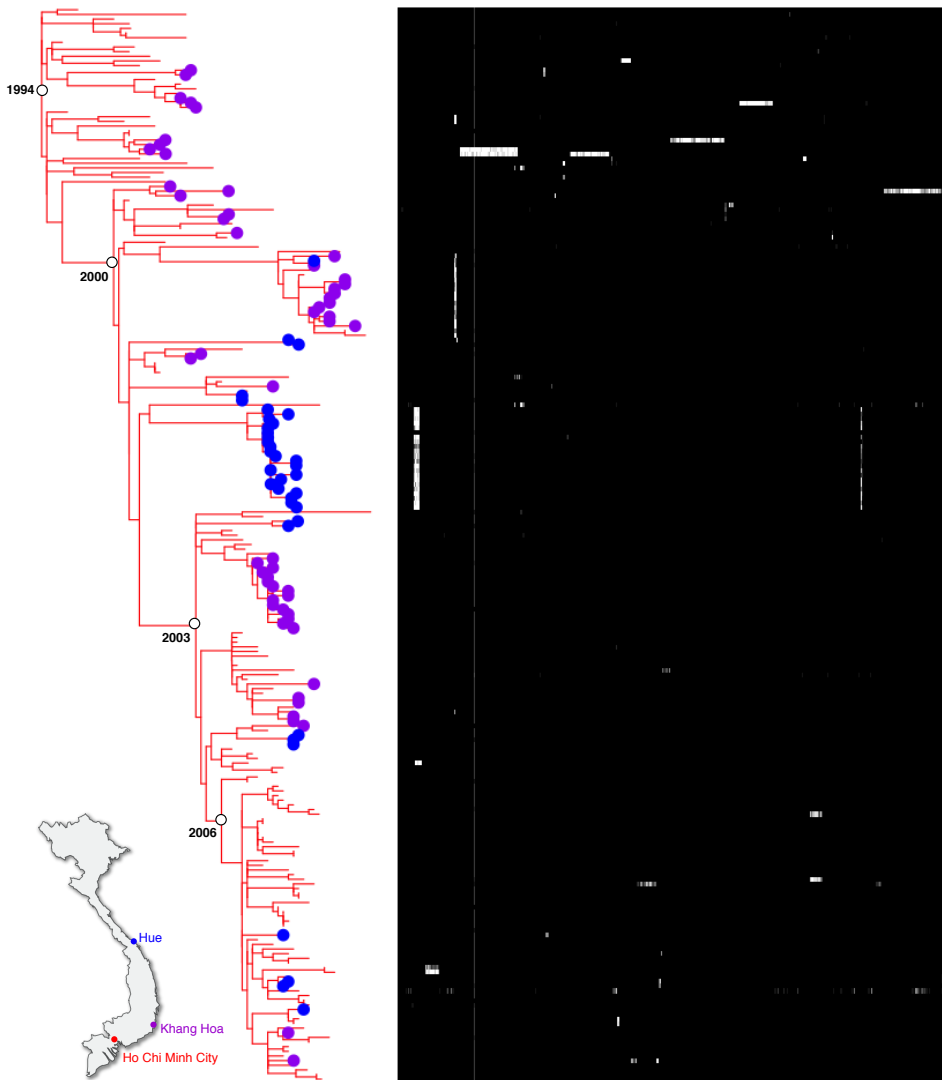

**Figure S5. Gene content variation within the *Shigella sonnei* VN clone**

Colours indicate the city of isolation, according to inset map; major sweeps are marked. **(a)**

Novel genes acquired by one or more isolates. Nearest reference sequences are given for

plasmids. **(b)** Conserved chromosomal genes subject to deletion in one or more isolates.

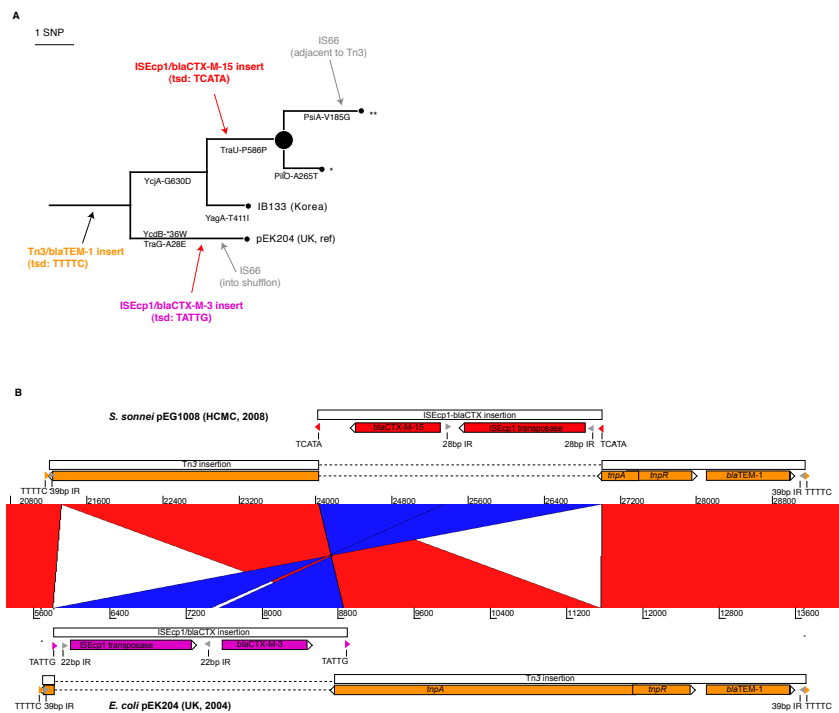

**Figure S6. Novel ESBL plasmid identified in HCMC *Shigella sonnei***

(a) SNP-based phylogeny for the IncI1 plasmid backbone, for pEK204 (NC\_013120) isolated from uropathogenic *E. coli* ST131 in the UK in 2004, *S. sonnei* IB133 isolated in Korea in 2003<sup>6</sup> and variants of pKHSB1 from *S. sonnei* isolated in HCMC in 2007-2010 (Table S1). For branches defined by SNPs within coding regions, details of the SNP and its coding effects are provided. Insertions within the plasmid backbone are labelled, colours match those in (b); tsd=target site duplication. (b) Genes and repeats annotated around the CTX-M insertion sites from pKHSB1 (top) and pEK204 (bottom). These are joined by homology blocks visualised in ACT, where red = same orientation and blue = inverse orientation. Position and orientation of 5 bp direct repeats (target site duplications) are shown with coloured arrows, labelled with the repeat sequence; grey arrows show inverted repeats (IR) labelled with their size in bp.

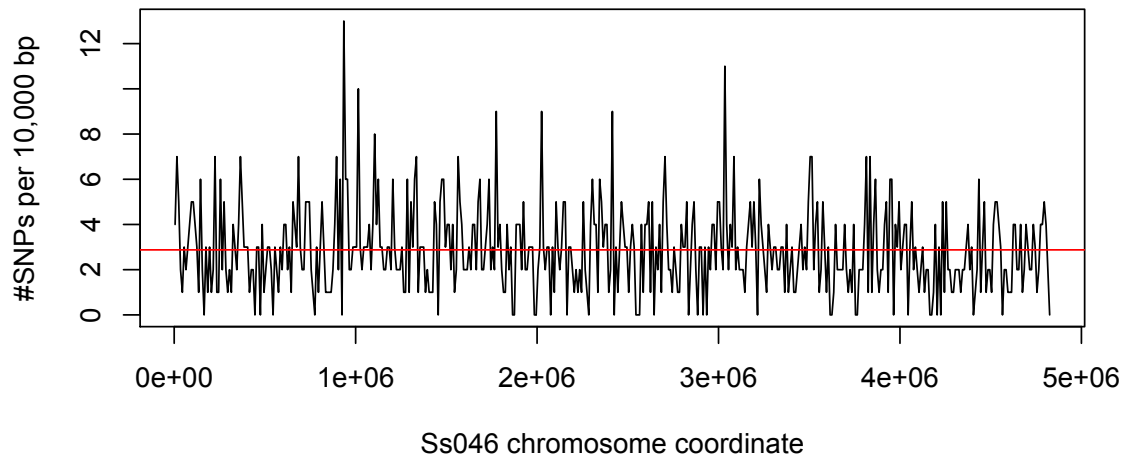

**Figure S7. Genomic SNP distribution within the *Shigella sonnei* VN clone**

Spatial distribution of SNPs arising in the VN clone, relative to the Ss046 chromosome reference sequence. The mean SNP rate, 3/10,000 bp (0.03%) is shown in red.



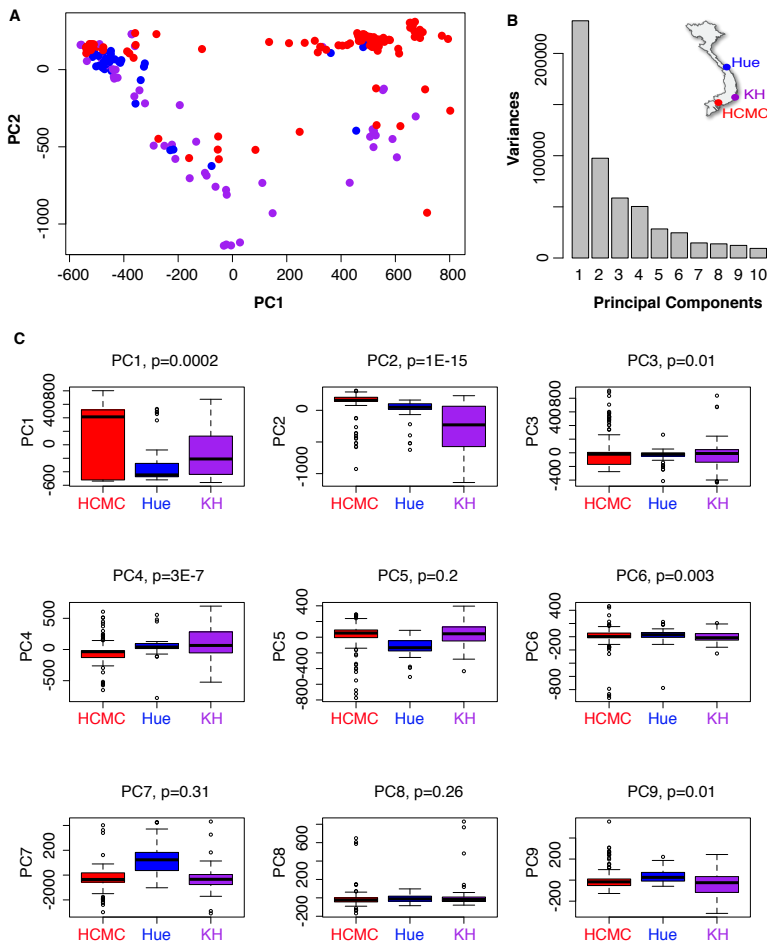

**Figure S8. The accessory gene content within the *Shigella sonnei* VN clone**

Principal components analysis of accessory gene content. **(a)** Clustering of isolates by first two accessory gene principal components, coloured by location as indicated in the map. **(b)** Scree plot showing the variance in gene content explained by each principal component. **(c)** Distribution of accessory gene principal components by city of isolation; p-values indicate strength of evidence for the association between location and the distribution of principal component values, using the Kolmogorov-Smirnov test

**Table S1. *Shigella sonnei* isolates sequenced in this study**

| Strain | Source | GPS study | Location  | Year | Depth | Lineage | Clone | pDPT1 (E5) | pDPT2 (Js) | gyrA Nal SNP | Nal | Cef | CTX-M | pKHSB1 | pEG356 | Other plasmids   |
|--------|--------|-----------|-----------|------|-------|---------|-------|------------|------------|--------------|-----|-----|-------|--------|--------|------------------|
| HUE05  | OUCRU  | no        | Hue       | 2008 | 82    | III     | Hue   | 1          | 0          | -            | S   | S   | -     | no     | no     |                  |
| HUE02  | OUCRU  | no        | Hue       | 2008 | 51.6  | III     | Hue   | 1          | 0          | -            | S   | S   | -     | no     | no     |                  |
| HUE01  | OUCRU  | no        | Hue       | 2008 | 57.9  | III     | Hue   | 1          | 0          | -            | S   | S   | -     | no     | no     |                  |
| HUE48  | OUCRU  | no        | Hue       | 2009 | 222   | III     | Hue   | 1          | 1          | -            | S   | S   | -     | no     | no     |                  |
| HUE47  | OUCRU  | no        | Hue       | 2009 | 158.1 | III     | Hue   | 1          | 1          | -            | S   | S   | -     | no     | no     |                  |
| HUE42  | OUCRU  | no        | Hue       | 2009 | 131.2 | III     | Hue   | 1          | 0          | -            | S   | S   | -     | no     | no     |                  |
| HUE40  | OUCRU  | no        | Hue       | 2009 | 233.8 | III     | Hue   | 1          | 0          | -            | S   | S   | -     | no     | no     |                  |
| HUE34  | OUCRU  | no        | Hue       | 2009 | 142.2 | III     | Hue   | 1          | 0          | -            | S   | R   | 14    | no     | no     |                  |
| HUE32  | OUCRU  | no        | Hue       | 2009 | 197.5 | III     | Hue   | 1          | 0          | -            | S   | S   | -     | no     | no     |                  |
| HUE31  | OUCRU  | no        | Hue       | 2009 | 111.6 | III     | Hue   | 1          | 0          | -            | S   | S   | -     | no     | no     |                  |
| HUE27  | OUCRU  | no        | Hue       | 2009 | 94    | III     | Hue   | 1          | 1          | -            | S   | S   | -     | no     | no     |                  |
| HUE26  | OUCRU  | no        | Hue       | 2009 | 31.3  | III     | Hue   | 1          | 1          | -            | S   | S   | -     | no     | no     |                  |
| HUE24  | OUCRU  | no        | Hue       | 2009 | 81.5  | III     | Hue   | 1          | 1          | -            | S   | S   | -     | no     | no     |                  |
| HUE23  | OUCRU  | no        | Hue       | 2009 | 83    | III     | Hue   | 1          | 1          | -            | S   | S   | -     | no     | no     |                  |
| HUE21  | OUCRU  | no        | Hue       | 2009 | 223.8 | III     | Hue   | 1          | 1          | -            | S   | S   | -     | no     | no     |                  |
| HUE16  | OUCRU  | no        | Hue       | 2009 | 90.9  | III     | Hue   | 1          | 1          | -            | S   | S   | -     | no     | no     |                  |
| HUE68  | OUCRU  | no        | Hue       | 2010 | 105.9 | III     | Hue   | 1          | 1          | -            | S   | S   | -     | no     | no     |                  |
| HUE67  | OUCRU  | no        | Hue       | 2010 | 240.3 | III     | Hue   | 1          | 1          | -            | S   | S   | -     | no     | no     |                  |
| HUE64  | OUCRU  | no        | Hue       | 2010 | 158.9 | III     | Hue   | 1          | 1          | -            | S   | S   | -     | no     | no     |                  |
| HUE62  | OUCRU  | no        | Hue       | 2010 | 57    | III     | Hue   | 1          | 1          | -            | S   | S   | -     | no     | no     |                  |
| HUE60  | OUCRU  | no        | Hue       | 2010 | 129.8 | III     | Hue   | 1          | 1          | -            | S   | S   | -     | no     | no     |                  |
| HUE57  | OUCRU  | no        | Hue       | 2010 | 78.8  | III     | Hue   | 1          | 1          | -            | S   | S   | -     | no     | no     |                  |
| EG0404 | OUCRU  | no        | HCMC      | 2007 | 17    | III     | KH1   | 1          | 1          | gyrA-83L     | R   | S   | -     | no     | no     | pHUSEC41-1       |
| HUE58  | OUCRU  | no        | Hue       | 2010 | 84.4  | III     | KH1   | 1          | 1          | gyrA-83L     | R   | S   | -     | no     | no     | pHUSEC41-1, LF82 |
| KH41   | OUCRU  | no        | Khanh Hoa | 2009 | 98.6  | III     | KH1   | 1          | 0          | gyrA-83L     | R   | S   | -     | no     | no     | pHUSEC41-1       |
| KH37   | OUCRU  | no        | Khanh Hoa | 2009 | 100.3 | III     | KH1   | 1          | 0          | gyrA-83L     | R   | S   | -     | no     | no     | pHUSEC41-1, R271 |
| KH35   | OUCRU  | no        | Khanh Hoa | 2009 | 175.9 | III     | KH1   | 1          | 0          | gyrA-83L     | R   | S   | -     | no     | no     | pHUSEC41-1       |
| KH27   | OUCRU  | no        | Khanh Hoa | 2009 | 136.4 | III     | KH1   | 1          | 1          | gyrA-83L     | R   | R   | 14    | no     | yes    | pHUSEC41-1       |
| KH26   | OUCRU  | no        | Khanh Hoa | 2009 | 115   | III     | KH1   | 1          | 1          | gyrA-83L     | R   | R   | 14    | no     | yes    | pHUSEC41-1       |
| KH24   | OUCRU  | no        | Khanh Hoa | 2009 | 110.3 | III     | KH1   | 1          | 1          | gyrA-83L     | R   | R   | 14    | no     | yes    | pHUSEC41-1       |
| KH23   | OUCRU  | no        | Khanh Hoa | 2009 | 140.6 | III     | KH1   | 1          | 1          | gyrA-83L     | R   | S   | -     | no     | no     | pHUSEC41-1       |
| KH20   | OUCRU  | no        | Khanh Hoa | 2009 | 174.1 | III     | KH1   | 1          | 1          | gyrA-83L     | R   | R   | 14    | no     | yes    | pHUSEC41-1       |
| KH18   | OUCRU  | no        | Khanh Hoa | 2009 | 146   | III     | KH1   | 1          | 1          | gyrA-83L     | R   | S   | -     | no     | no     | pHUSEC41-1       |
| KH15   | OUCRU  | no        | Khanh Hoa | 2009 | 159   | III     | KH1   | 1          | 1          | gyrA-83L     | R   | S   | -     | no     | no     | pHUSEC41-1       |

|        |       |    |           |      |       |     |        |       |       |          |   |   |    |    |     |               |
|--------|-------|----|-----------|------|-------|-----|--------|-------|-------|----------|---|---|----|----|-----|---------------|
| KH11   | OUCRU | no | Khanh Hoa | 2009 | 239.4 | III | KH1    | 1     | 0.627 | gyrA-83L | R | S | -  | no | no  | pHUSEC41-1    |
| KH09   | OUCRU | no | Khanh Hoa | 2009 | 177.2 | III | KH1    | 1     | 0.536 | gyrA-83L | R | S | -  | no | no  | pHUSEC41-1    |
| KH53   | OUCRU | no | Khanh Hoa | 2010 | 134.6 | III | KH1    | 1     | 1     | gyrA-83L | R | S | -  | no | no  | pHUSEC41-1    |
| EG0467 | OUCRU | no | HCMC      | 2008 | 15    | III | KH2    | 1     | 1     | gyrA-87Y | R | S | -  | no | no  |               |
| KH40   | OUCRU | no | Khanh Hoa | 2009 | 138.7 | III | KH2    | 1     | 0     | gyrA-87Y | R | S | -  | no | no  |               |
| KH34   | OUCRU | no | Khanh Hoa | 2009 | 127.8 | III | KH2    | 1     | 0     | gyrA-87Y | R | R | 14 | no | yes |               |
| KH33   | OUCRU | no | Khanh Hoa | 2009 | 179.6 | III | KH2    | 1     | 0     | gyrA-87Y | R | S | -  | no | no  |               |
| KH32   | OUCRU | no | Khanh Hoa | 2009 | 175.1 | III | KH2    | 1     | 0     | gyrA-87Y | R | R | 14 | no | yes |               |
| KH30   | OUCRU | no | Khanh Hoa | 2009 | 123.6 | III | KH2    | 1     | 0.827 | gyrA-87Y | R | R | 14 | no | yes |               |
| KH25   | OUCRU | no | Khanh Hoa | 2009 | 126.8 | III | KH2    | 1     | 0.961 | gyrA-87Y | R | R | 14 | no | yes |               |
| KH21   | OUCRU | no | Khanh Hoa | 2009 | 122.2 | III | KH2    | 1     | 0.62  | gyrA-87Y | R | S | -  | no | no  |               |
| KH19   | OUCRU | no | Khanh Hoa | 2009 | 111.1 | III | KH2    | 1     | 0.571 | gyrA-87Y | R | R | 14 | no | yes | R271          |
| KH17   | OUCRU | no | Khanh Hoa | 2009 | 190.2 | III | KH2    | 1     | 0.6   | gyrA-87Y | R | S | -  | no | no  |               |
| KH14   | OUCRU | no | Khanh Hoa | 2009 | 158.4 | III | KH2    | 1     | 0.998 | gyrA-87Y | R | R | 14 | no | yes |               |
| KH12   | OUCRU | no | Khanh Hoa | 2009 | 189.1 | III | KH2    | 1     | 0.581 | gyrA-87Y | R | R | 14 | no | yes |               |
| KH07   | OUCRU | no | Khanh Hoa | 2009 | 118.8 | III | KH2    | 1     | 0.407 | gyrA-87Y | R | R | 14 | no | yes |               |
| KH06   | OUCRU | no | Khanh Hoa | 2009 | 105.5 | III | KH2    | 1     | 0.988 | gyrA-87Y | R | R | 14 | no | yes |               |
| KH05   | OUCRU | no | Khanh Hoa | 2009 | 89.9  | III | KH2    | 1     | 0.986 | gyrA-87Y | R | S | -  | no | no  |               |
| KH04   | OUCRU | no | Khanh Hoa | 2009 | 74.9  | III | KH2    | 1     | 1     | gyrA-87Y | R | R | 14 | no | yes |               |
| KH43   | OUCRU | no | Khanh Hoa | 2010 | 140.2 | III | KH2    | 1     | 1     | gyrA-87Y | R | R | 14 | no | yes |               |
| DE0330 | OUCRU | no | HCMC      | 2000 | 16    | I   | LinI   | 0.86  | 0.05  | -        | S | S | -  | no | no  |               |
| EG0352 | OUCRU | no | HCMC      | 2007 | 11    | I   | LinI   | 0.9   | 0.21  | -        | S | S | -  | no | no  |               |
| MS0094 | OUCRU | no | HCMC      | 1996 | 158.6 | III | nonVN  | 0.067 | 0.678 | -        | S | S | -  | no | no  |               |
| MS0122 | OUCRU | no | HCMC      | 1996 | 28    | III | nonVN  | 0.02  | 0.14  | -        | S | S | -  | no | no  |               |
| MS0128 | OUCRU | no | HCMC      | 1996 | 19    | III | sweep1 | 1     | 1     | -        | S | S | -  | no | no  |               |
| MS0110 | OUCRU | no | HCMC      | 1996 | 24    | III | sweep1 | 1     | 1     | -        | S | S | -  | no | no  |               |
| DE0489 | OUCRU | no | HCMC      | 2000 | 29    | III | sweep1 | 1     | 1     | -        | S | S | -  | no | no  |               |
| DE0477 | OUCRU | no | HCMC      | 2000 | 8     | III | sweep1 | 1     | 1     | -        | S | S | -  | no | no  |               |
| DE0427 | OUCRU | no | HCMC      | 2000 | 26    | III | sweep1 | 1     | 1     | -        | S | S | -  | no | no  |               |
| DE0306 | OUCRU | no | HCMC      | 2000 | 20    | III | sweep1 | 1     | 1     | -        | S | S | -  | no | no  |               |
| DE0303 | OUCRU | no | HCMC      | 2000 | 23    | III | sweep1 | 1     | 1     | -        | S | S | -  | no | no  |               |
| DE0295 | OUCRU | no | HCMC      | 2000 | 18    | III | sweep1 | 1     | 1     | -        | S | S | -  | no | no  |               |
| DE0248 | OUCRU | no | HCMC      | 2000 | 15    | III | sweep1 | 1     | 1     | -        | S | S | -  | no | no  | novel plasmid |
| DE0199 | OUCRU | no | HCMC      | 2000 | 11    | III | sweep1 | 1     | 1     | -        | S | S | -  | no | no  |               |
| DE0127 | OUCRU | no | HCMC      | 2000 | 21    | III | sweep1 | 1     | 1     | -        | S | S | -  | no | no  |               |
| DE0115 | OUCRU | no | HCMC      | 2000 | 16    | III | sweep1 | 1     | 1     | -        | S | S | -  | no | no  |               |
| DE0965 | OUCRU | no | HCMC      | 2001 | 25    | III | sweep1 | 1     | 1     | -        | S | S | -  | no | no  |               |
| DE0900 | OUCRU | no | HCMC      | 2001 | 34    | III | sweep1 | 1     | 1     | -        | S | S | -  | no | no  |               |
| DE0846 | OUCRU | no | HCMC      | 2001 | 32    | III | sweep1 | 1     | 1     | -        | S | S | -  | no | no  |               |
| DE0816 | OUCRU | no | HCMC      | 2001 | 17    | III | sweep1 | 1     | 1     | -        | S | S | -  | no | no  |               |
| DE0685 | OUCRU | no | HCMC      | 2001 | 36    | III | sweep1 | 1     | 1     | -        | S | S | -  | no | no  |               |

|        |       |    |           |      |       |     |        |   |   |          |   |   |    |     |    |            |
|--------|-------|----|-----------|------|-------|-----|--------|---|---|----------|---|---|----|-----|----|------------|
| DE0654 | OUCRU | no | HCMC      | 2001 | 23    | III | sweep1 | 1 | 1 | -        | S | S | -  | no  | no |            |
| DE0611 | OUCRU | no | HCMC      | 2001 | 26    | III | sweep1 | 1 | 1 | -        | S | R | 14 | no  | no |            |
| DE0579 | OUCRU | no | HCMC      | 2001 | 27    | III | sweep1 | 1 | 1 | gyrA-83L | R | S | -  | no  | no |            |
| DE1486 | OUCRU | no | HCMC      | 2002 | 44    | III | sweep1 | 1 | 1 | -        | S | S | -  | no  | no |            |
| DE1336 | OUCRU | no | HCMC      | 2002 | 18    | III | sweep1 | 1 | 1 | gyrA-87G | R | S | -  | no  | no | pHUSEC41-1 |
| DE1318 | OUCRU | no | HCMC      | 2002 | 17    | III | sweep1 | 1 | 1 | -        | S | S | -  | no  | no |            |
| DE1256 | OUCRU | no | HCMC      | 2002 | 11    | III | sweep1 | 1 | 1 | -        | S | S | -  | no  | no |            |
| DE1209 | OUCRU | no | HCMC      | 2002 | 18    | III | sweep1 | 1 | 1 | gyrA-87G | R | S | -  | no  | no |            |
| DE1198 | OUCRU | no | HCMC      | 2002 | 30    | III | sweep1 | 1 | 1 | -        | S | S | -  | no  | no |            |
| DE1165 | OUCRU | no | HCMC      | 2002 | 11    | III | sweep1 | 1 | 1 | -        | S | S | -  | no  | no |            |
| DE1150 | OUCRU | no | HCMC      | 2002 | 19    | III | sweep1 | 1 | 1 | gyrA-87G | R | S | -  | no  | no |            |
| DE1140 | OUCRU | no | HCMC      | 2002 | 15    | III | sweep1 | 1 | 1 | -        | S | S | -  | no  | no |            |
| IB1970 | IVI   | no | Khanh Hoa | 2001 | 21    | III | sweep1 | 1 | 1 | -        | S | S | -  | no  | no |            |
| IB2024 | IVI   | no | Khanh Hoa | 2002 | 52    | III | sweep1 | 1 | 1 | gyrA-87G | R | S | -  | no  | no | R271       |
| IB2015 | IVI   | no | Khanh Hoa | 2002 | 18    | III | sweep1 | 1 | 1 | -        | S | S | -  | no  | no |            |
| IB2026 | IVI   | no | Khanh Hoa | 2003 | 33    | III | sweep1 | 1 | 1 | gyrA-87G | R | S | -  | no  | no |            |
| IB2009 | IVI   | no | Khanh Hoa | 2003 | 11    | III | sweep1 | 1 | 1 | -        | S | S | -  | no  | no |            |
| IB2008 | IVI   | no | Khanh Hoa | 2003 | 25    | III | sweep1 | 1 | 1 | -        | S | S | -  | no  | no | mini       |
| IB2004 | IVI   | no | Khanh Hoa | 2003 | 33    | III | sweep1 | 1 | 1 | -        | S | S | -  | no  | no |            |
| IB2000 | IVI   | no | Khanh Hoa | 2003 | 29    | III | sweep1 | 1 | 1 | -        | S | S | -  | no  | no | mini       |
| IB1995 | IVI   | no | Khanh Hoa | 2003 | 13    | III | sweep1 | 1 | 1 | gyrA-87G | R | S | -  | no  | no | R271       |
| DE1404 | OUCRU | no | HCMC      | 2002 | 15    | III | sweep2 | 1 | 1 | -        | S | S | -  | no  | no |            |
| DE1208 | OUCRU | no | HCMC      | 2002 | 18    | III | sweep2 | 1 | 1 | -        | S | S | -  | no  | no |            |
| DE1191 | OUCRU | no | HCMC      | 2002 | 16    | III | sweep2 | 1 | 1 | -        | S | S | -  | no  | no |            |
| DE1063 | OUCRU | no | HCMC      | 2002 | 21    | III | sweep2 | 1 | 1 | -        | S | S | -  | no  | no |            |
| EG0304 | OUCRU | no | HCMC      | 2006 | 18    | III | sweep2 | 1 | 1 | -        | S | S | -  | no  | no |            |
| EG0410 | OUCRU | no | HCMC      | 2007 | 10    | III | sweep2 | 1 | 1 | -        | S | S | -  | no  | no |            |
| EG0392 | OUCRU | no | HCMC      | 2007 | 8     | III | sweep2 | 1 | 1 | gyrA-83L | R | S | -  | no  | no |            |
| EG0386 | OUCRU | no | HCMC      | 2007 | 15    | III | sweep2 | 1 | 1 | -        | S | S | -  | no  | no |            |
| EG0385 | OUCRU | no | HCMC      | 2007 | 14    | III | sweep2 | 1 | 1 | gyrA-83L | R | S | -  | no  | no | R271       |
| EG0379 | OUCRU | no | HCMC      | 2007 | 14    | III | sweep2 | 1 | 1 | -        | S | S | -  | no  | no |            |
| EG0373 | OUCRU | no | HCMC      | 2007 | 37    | III | sweep2 | 1 | 1 | -        | S | R | 15 | yes | no |            |
| EG0372 | OUCRU | no | HCMC      | 2007 | 15    | III | sweep2 | 1 | 1 | gyrA-83L | R | S | -  | no  | no |            |
| EG0159 | OUCRU | no | HCMC      | 2007 | 7     | III | sweep2 | 1 | 1 | gyrA-83L | R | S | -  | no  | no |            |
| HUE43  | OUCRU | no | Hue       | 2009 | 106.8 | III | sweep2 | 1 | 0 | -        | S | S | -  | no  | no |            |
| HUE33  | OUCRU | no | Hue       | 2009 | 102.5 | III | sweep2 | 1 | 0 | -        | S | S | -  | no  | no |            |
| HUE30  | OUCRU | no | Hue       | 2009 | 182   | III | sweep2 | 1 | 0 | -        | S | S | -  | no  | no |            |
| HUE25  | OUCRU | no | Hue       | 2009 | 190.3 | III | sweep2 | 1 | 1 | -        | S | S | -  | no  | no |            |
| IB2018 | IVI   | no | Khanh Hoa | 2002 | 58    | III | sweep2 | 1 | 1 | -        | S | S | -  | no  | no |            |
| IB1987 | IVI   | no | Khanh Hoa | 2002 | 43    | III | sweep2 | 1 | 1 | gyrA-83L | R | S | -  | no  | no |            |
| IB1997 | IVI   | no | Khanh Hoa | 2003 | 37    | III | sweep2 | 1 | 1 | gyrA-83L | R | S | -  | no  | no |            |

|        |       |    |           |      |        |     |        |   |       |          |   |   |    |     |     |
|--------|-------|----|-----------|------|--------|-----|--------|---|-------|----------|---|---|----|-----|-----|
| IB1993 | IVI   | no | Khanh Hoa | 2003 | 34     | III | sweep2 | 1 | 1     | -        | S | S | -  | no  | no  |
| IB1990 | IVI   | no | Khanh Hoa | 2003 | 17     | III | sweep2 | 1 | 1     | -        | S | S | -  | no  | no  |
| KH02   | OUCRU | no | Khanh Hoa | 2009 | 186.5  | III | sweep2 | 1 | 1     | gyrA-83L | R | S | -  | no  | no  |
| KH55   | OUCRU | no | Khanh Hoa | 2010 | 160    | III | sweep2 | 1 | 0     | gyrA-83L | R | S | -  | no  | no  |
| KH54   | OUCRU | no | Khanh Hoa | 2010 | 90.1   | III | sweep2 | 1 | 1     | gyrA-83L | R | S | -  | no  | no  |
| KH42   | OUCRU | no | Khanh Hoa | 2010 | 146.3  | III | sweep2 | 1 | 1     | -        | S | R | 14 | no  | no  |
| EG0318 | OUCRU | no | HCMC      | 2006 | 19     | III | sweep3 | 1 | 1     | gyrA-87Y | R | S | -  | no  | no  |
| EG0315 | OUCRU | no | HCMC      | 2006 | 37     | III | sweep3 | 1 | 1     | gyrA-87Y | R | S | -  | no  | no  |
| EG0313 | OUCRU | no | HCMC      | 2006 | 8      | III | sweep3 | 1 | 1     | gyrA-87Y | R | S | -  | no  | no  |
| EG0309 | OUCRU | no | HCMC      | 2006 | 23     | III | sweep3 | 1 | 1     | gyrA-87Y | R | S | -  | no  | no  |
| EG0401 | OUCRU | no | HCMC      | 2007 | 13     | III | sweep3 | 1 | 0.18  | gyrA-87Y | R | S | -  | no  | no  |
| EG0395 | OUCRU | no | HCMC      | 2007 | 26     | III | sweep3 | 1 | 1     | gyrA-87Y | R | R | 15 | yes | no  |
| EG0394 | OUCRU | no | HCMC      | 2007 | 7      | III | sweep3 | 1 | 1     | gyrA-87Y | R | S | -  | no  | no  |
| EG0393 | OUCRU | no | HCMC      | 2007 | 17     | III | sweep3 | 1 | 0.5   | gyrA-87Y | R | S | -  | no  | no  |
| EG0390 | OUCRU | no | HCMC      | 2007 | 34     | III | sweep3 | 1 | 1     | gyrA-87Y | R | R | 15 | yes | no  |
| EG0388 | OUCRU | no | HCMC      | 2007 | 19     | III | sweep3 | 1 | 1     | gyrA-87Y | R | S | -  | no  | no  |
| EG0383 | OUCRU | no | HCMC      | 2007 | 10     | III | sweep3 | 1 | 0.2   | gyrA-87Y | R | S | -  | no  | no  |
| EG0375 | OUCRU | no | HCMC      | 2007 | 19     | III | sweep3 | 1 | 1     | gyrA-87Y | R | S | -  | no  | no  |
| EG0369 | OUCRU | no | HCMC      | 2007 | 22     | III | sweep3 | 1 | 1     | gyrA-87Y | R | S | -  | no  | no  |
| EG0365 | OUCRU | no | HCMC      | 2007 | 13     | III | sweep3 | 1 | 1     | gyrA-87Y | R | S | -  | no  | no  |
| EG0362 | OUCRU | no | HCMC      | 2007 | 21     | III | sweep3 | 1 | 1     | gyrA-87Y | R | S | -  | no  | no  |
| EG0357 | OUCRU | no | HCMC      | 2007 | 28     | III | sweep3 | 1 | 0.8   | gyrA-87Y | R | S | -  | no  | no  |
| EG0129 | OUCRU | no | HCMC      | 2007 | 9      | III | sweep3 | 1 | 0.16  | gyrA-87Y | R | S | -  | no  | no  |
| EG1001 | OUCRU | no | HCMC      | 2008 | 14     | III | sweep3 | 1 | 0.31  | gyrA-87Y | R | R | 15 | yes | no  |
| EG0451 | OUCRU | no | HCMC      | 2008 | 17     | III | sweep3 | 1 | 1     | gyrA-87Y | R | S | -  | no  | no  |
| EG0430 | OUCRU | no | HCMC      | 2008 | 28     | III | sweep3 | 1 | 0.78  | gyrA-87Y | R | R | 15 | yes | no  |
| EG0425 | OUCRU | no | HCMC      | 2008 | 14     | III | sweep3 | 1 | 1     | gyrA-87Y | R | S | -  | no  | no  |
| EG0255 | OUCRU | no | HCMC      | 2008 | 14     | III | sweep3 | 1 | 0.23  | gyrA-87Y | R | S | -  | no  | no  |
| EG1017 | OUCRU | no | HCMC      | 2009 | 111.1  | III | sweep3 | 1 | 0     | gyrA-87Y | R | R | 15 | yes | no  |
| EG1014 | OUCRU | no | HCMC      | 2009 | 588    | III | sweep3 | 1 | 0     | gyrA-87Y | R | R | 15 | yes | no  |
| EG1015 | OUCRU | no | HCMC      | 2009 | 1165.6 | III | sweep3 | 0 | 0     | gyrA-87Y | R | R | 15 | yes | no  |
| HUE50  | OUCRU | no | Hue       | 2009 | 139    | III | sweep3 | 1 | 1     | gyrA-87Y | R | R | 14 | no  | yes |
| HUE46  | OUCRU | no | Hue       | 2009 | 175.4  | III | sweep3 | 1 | 0     | gyrA-87Y | R | S | -  | no  | no  |
| HUE29  | OUCRU | no | Hue       | 2009 | 190    | III | sweep3 | 1 | 1     | gyrA-87Y | R | S | -  | no  | no  |
| HUE55  | OUCRU | no | Hue       | 2010 | 171.6  | III | sweep3 | 1 | 0.999 | gyrA-87Y | R | S | -  | no  | no  |
| HUE53  | OUCRU | no | Hue       | 2010 | 95.4   | III | sweep3 | 1 | 1     | gyrA-87Y | R | S | -  | no  | no  |
| KH29   | OUCRU | no | Khanh Hoa | 2009 | 144.7  | III | sweep3 | 1 | 1     | gyrA-87Y | R | S | -  | no  | no  |
| KH28   | OUCRU | no | Khanh Hoa | 2009 | 191.2  | III | sweep3 | 1 | 1     | gyrA-87Y | R | S | -  | no  | no  |
| KH16   | OUCRU | no | Khanh Hoa | 2009 | 175.8  | III | sweep3 | 1 | 1     | gyrA-87Y | R | S | -  | no  | no  |
| KH13   | OUCRU | no | Khanh Hoa | 2009 | 240.1  | III | sweep3 | 1 | 1     | gyrA-87Y | R | S | -  | no  | no  |
| KH10   | OUCRU | no | Khanh Hoa | 2009 | 110    | III | sweep3 | 1 | 0.566 | gyrA-87Y | R | S | -  | no  | no  |

R271

R271,  
pSal8934a

|        |       |    |           |      |       |     |        |       |       |          |   |   |    |     |    |      |
|--------|-------|----|-----------|------|-------|-----|--------|-------|-------|----------|---|---|----|-----|----|------|
| KH57   | OUCRU | no | Khanh Hoa | 2010 | 162.1 | III | sweep3 | 1     | 0     | gyrA-87Y | R | S | -  | no  | no |      |
| EG1008 | OUCRU | no | HCMC      | 2008 | 41    | III | sweep4 | 1     | 0.41  | gyrA-87Y | R | R | 15 | yes | no |      |
| EG1004 | OUCRU | no | HCMC      | 2008 | 23    | III | sweep4 | 1     | 0.54  | gyrA-87Y | R | R | 15 | yes | no |      |
| EG0472 | OUCRU | no | HCMC      | 2008 | 15    | III | sweep4 | 1     | 1     | gyrA-87Y | R | R | 15 | yes | no |      |
| EG0204 | OUCRU | no | HCMC      | 2008 | 15    | III | sweep4 | 1     | 0.2   | gyrA-87Y | R | R | 15 | yes | no |      |
| 10102  | OUCRU | no | HCMC      | 2009 | 106.4 | III | sweep4 | 1     | 0.408 | gyrA-87Y | R | R | 15 | yes | no |      |
| EG1029 | OUCRU | no | HCMC      | 2009 | 146.1 | III | sweep4 | 1     | 0     | gyrA-87Y | R | R | 15 | yes | no |      |
| EG1028 | OUCRU | no | HCMC      | 2009 | 185.7 | III | sweep4 | 1     | 0     | gyrA-87Y | R | R | 15 | yes | no |      |
| EG1027 | OUCRU | no | HCMC      | 2009 | 170   | III | sweep4 | 1     | 0     | gyrA-87Y | R | R | 15 | yes | no | R271 |
| EG1026 | OUCRU | no | HCMC      | 2009 | 150.6 | III | sweep4 | 1     | 0.915 | gyrA-87Y | R | R | 15 | yes | no |      |
| EG1025 | OUCRU | no | HCMC      | 2009 | 224.1 | III | sweep4 | 1     | 0.6   | gyrA-87Y | R | R | 15 | yes | no |      |
| EG1024 | OUCRU | no | HCMC      | 2009 | 109.6 | III | sweep4 | 1     | 0.444 | gyrA-87Y | R | R | 15 | yes | no |      |
| EG1023 | OUCRU | no | HCMC      | 2009 | 29.5  | III | sweep4 | 1     | 0.35  | gyrA-87Y | R | R | 15 | yes | no |      |
| EG1022 | OUCRU | no | HCMC      | 2009 | 32    | III | sweep4 | 1     | 0     | gyrA-87Y | R | R | 15 | yes | no |      |
| EG1021 | OUCRU | no | HCMC      | 2009 | 75.9  | III | sweep4 | 1     | 0     | gyrA-87Y | R | R | 15 | yes | no |      |
| EG1020 | OUCRU | no | HCMC      | 2009 | 75.1  | III | sweep4 | 1     | 0     | gyrA-87Y | R | R | 15 | yes | no | R271 |
| EG1019 | OUCRU | no | HCMC      | 2009 | 31.9  | III | sweep4 | 1     | 0     | gyrA-87Y | R | R | 15 | yes | no |      |
| EG1018 | OUCRU | no | HCMC      | 2009 | 45.3  | III | sweep4 | 1     | 0     | gyrA-87Y | R | R | 15 | yes | no |      |
| EG1016 | OUCRU | no | HCMC      | 2009 | 87.6  | III | sweep4 | 1     | 0     | gyrA-87Y | R | R | 15 | yes | no |      |
| HUE22  | OUCRU | no | Hue       | 2009 | 142   | III | sweep4 | 1     | 1     | gyrA-87Y | R | R | 15 | yes | no |      |
| HUE20  | OUCRU | no | Hue       | 2009 | 91.6  | III | sweep4 | 1     | 0     | gyrA-87Y | R | R | 15 | yes | no |      |
| HUE19  | OUCRU | no | Hue       | 2009 | 294   | III | sweep4 | 1     | 0     | gyrA-87Y | R | R | 15 | yes | no |      |
| HUE17  | OUCRU | no | Hue       | 2009 | 155.8 | III | sweep4 | 1     | 1     | gyrA-87Y | R | R | 15 | yes | no |      |
| KH38   | OUCRU | no | Khanh Hoa | 2009 | 229   | III | sweep4 | 1     | 0     | gyrA-87Y | R | R | 15 | yes | no | mini |
| KH45   | OUCRU | no | Khanh Hoa | 2010 | 65.2  | III | sweep4 | 1     | 1     | gyrA-87Y | R | R | 15 | yes | no | mini |
| MS0004 | OUCRU | no | HCMC      | 1995 | 22    | III | VN     | 0.85  | 0.17  | -        | S | S | -  | no  | no |      |
| MS0039 | OUCRU | no | HCMC      | 1995 | 19    | III | VN     | 0.84  | 0.16  | -        | S | S | -  | no  | no |      |
| MS0034 | OUCRU | no | HCMC      | 1995 | 14    | III | VN     | 0.84  | 0.14  | -        | S | S | -  | no  | no |      |
| MS0032 | OUCRU | no | HCMC      | 1995 | 15    | III | VN     | 0.83  | 0.15  | -        | S | S | -  | no  | no |      |
| MS0043 | OUCRU | no | HCMC      | 1995 | 134.8 | III | VN     | 0.077 | 0     | -        | S | S | -  | no  | no |      |
| MS0063 | OUCRU | no | HCMC      | 1995 | 18    | III | VN     | 0.05  | 0.18  | -        | S | S | -  | no  | no |      |
| MS0069 | OUCRU | no | HCMC      | 1995 | 26    | III | VN     | 0.02  | 0.11  | -        | S | S | -  | no  | no |      |
| MS0065 | OUCRU | no | HCMC      | 1995 | 26    | III | VN     | 0.02  | 0.12  | -        | S | S | -  | no  | no |      |
| MS0048 | OUCRU | no | HCMC      | 1995 | 17    | III | VN     | 0.02  | 0.13  | -        | S | S | -  | no  | no |      |
| MS0035 | OUCRU | no | HCMC      | 1995 | 21    | III | VN     | 0.02  | 0.11  | -        | S | S | -  | no  | no |      |
| MS0011 | OUCRU | no | HCMC      | 1995 | 13    | III | VN     | 0.02  | 0.15  | -        | S | S | -  | no  | no |      |
| MS0080 | OUCRU | no | HCMC      | 1995 | 13    | III | VN     | 0.01  | 0.11  | -        | S | S | -  | no  | no |      |
| MS0070 | OUCRU | no | HCMC      | 1995 | 18    | III | VN     | 0.01  | 0.12  | -        | S | S | -  | no  | no |      |
| MS0042 | OUCRU | no | HCMC      | 1995 | 17    | III | VN     | 0.01  | 0.12  | -        | S | S | -  | no  | no |      |
| MS0083 | OUCRU | no | HCMC      | 1996 | 25    | III | VN     | 0.88  | 0.17  | -        | S | S | -  | no  | no |      |
| MS0102 | OUCRU | no | HCMC      | 1996 | 23    | III | VN     | 0.83  | 0.16  | -        | S | S | -  | no  | no |      |

|        |       |     |           |      |       |     |        |      |       |          |   |   |       |     |     |            |
|--------|-------|-----|-----------|------|-------|-----|--------|------|-------|----------|---|---|-------|-----|-----|------------|
| MS0119 | OUCRU | no  | HCMC      | 1996 | 28    | III | VN     | 0.04 | 0.15  | -        | S | S | -     | no  | no  |            |
| MS0111 | OUCRU | no  | HCMC      | 1996 | 20    | III | VN     | 0.02 | 0.13  | -        | S | S | -     | no  | no  |            |
| MS0127 | OUCRU | no  | HCMC      | 1996 | 17    | III | VN     | 0.01 | 0.16  | -        | S | S | -     | no  | no  |            |
| DE0490 | OUCRU | no  | HCMC      | 2000 | 20    | III | VN     | 0.05 | 0.19  | gyrA-83L | R | S | -     | no  | no  |            |
| DE0655 | OUCRU | no  | HCMC      | 2001 | 15    | III | VN     | 0.07 | 0.16  | -        | S | S | -     | no  | no  |            |
| DE0891 | OUCRU | no  | HCMC      | 2001 | 26    | III | VN     | 0.02 | 0.13  | gyrA-83L | R | S | -     | no  | no  |            |
| DE0885 | OUCRU | no  | HCMC      | 2001 | 35    | III | VN     | 0.02 | 0.12  | gyrA-83L | R | S | -     | no  | no  |            |
| IB2013 | IVI   | no  | Khanh Hoa | 2001 | 51    | III | VN     | 0.08 | 0.31  | -        | S | S | -     | no  | no  |            |
| IB2012 | IVI   | no  | Khanh Hoa | 2001 | 17    | III | VN     | 0.05 | 0.32  | gyrA-87Y | R | S | -     | no  | no  | none       |
| IB1985 | IVI   | no  | Khanh Hoa | 2002 | 20    | III | VN     | 0.23 | 0.4   | -        | S | S | -     | no  | no  |            |
| IB1976 | IVI   | no  | Khanh Hoa | 2002 | 11    | III | VN     | 0.04 | 0.17  | gyrA-87G | R | S | -     | no  | no  |            |
| IB1980 | IVI   | no  | Khanh Hoa | 2002 | 48    | III | VN     | 0.02 | 0.16  | -        | S | S | -     | no  | no  |            |
| 30450  | OUCRU | yes | HCMC      | 2010 | 188.3 | III | KH1    | 1    | 0     | gyrA-83L | R | S | -     | no  | no  | pHUSEC41-1 |
| 30010  | OUCRU | yes | HCMC      | 2009 | 111.6 | III | KH1    | 1    | 1     | gyrA-83L | R | S | -     | no  | no  | pHUSEC41-1 |
| 20261  | OUCRU | yes | HCMC      | 2009 | 252.4 | III | KH1    | 1    | 1     | gyrA-83L | R | S | -     | no  | no  | pHUSEC41-1 |
| 10073  | OUCRU | yes | HCMC      | 2009 | 126.8 | III | KH1    | 1    | 0     | gyrA-83L | R | S | -     | no  | no  |            |
| 30366  | OUCRU | yes | HCMC      | 2009 | 147.4 | III | KH2    | 1    | 0     | gyrA-87Y | R | S | -     | no  | no  |            |
| 10021  | OUCRU | yes | HCMC      | 2009 | 13.1  | III | KH2    | 1    | 0     | gyrA-87Y | R | S | -     | no  | no  |            |
| 30293  | OUCRU | yes | HCMC      | 2009 | 156.3 | III | sweep2 | 1    | 0     | gyrA-83L | R | R | 14,15 | yes | yes |            |
| 10071  | OUCRU | yes | HCMC      | 2009 | 35.8  | III | sweep2 | 1    | 0     | -        | S | S | -     | no  | no  |            |
| 10031  | OUCRU | yes | HCMC      | 2009 | 12.8  | III | sweep2 | 1    | 0     | -        | S | S | -     | no  | no  |            |
| 30451  | OUCRU | yes | HCMC      | 2010 | 260.7 | III | sweep3 | 1    | 0     | gyrA-87Y | R | S | -     | no  | no  |            |
| 30073  | OUCRU | yes | HCMC      | 2009 | 252.8 | III | sweep3 | 1    | 1     | gyrA-87Y | R | S | -     | no  | no  | pSal8934a  |
| 30003  | OUCRU | yes | HCMC      | 2009 | 328.5 | III | sweep3 | 1    | 0     | gyrA-87Y | R | S | -     | no  | no  |            |
| 20094  | OUCRU | yes | HCMC      | 2009 | 100.8 | III | sweep3 | 1    | 1     | gyrA-87Y | R | R | 14    | no  | yes |            |
| 30387  | OUCRU | yes | HCMC      | 2010 | 114.2 | III | sweep4 | 1    | 0     | gyrA-87Y | R | R | 15    | yes | no  |            |
| 30371  | OUCRU | yes | HCMC      | 2009 | 116.6 | III | sweep4 | 1    | 0.98  | gyrA-87Y | R | R | 15    | yes | no  |            |
| 30233  | OUCRU | yes | HCMC      | 2009 | 182.8 | III | sweep4 | 1    | 0     | gyrA-87Y | R | R | 15    | yes | no  | R271, mini |
| 30174  | OUCRU | yes | HCMC      | 2009 | 105.6 | III | sweep4 | 1    | 0     | gyrA-87Y | R | R | 15    | yes | no  | R271       |
| 30172  | OUCRU | yes | HCMC      | 2009 | 201.7 | III | sweep4 | 1    | 0     | gyrA-87Y | R | R | 15    | yes | no  | R271       |
| 30169  | OUCRU | yes | HCMC      | 2009 | 153.5 | III | sweep4 | 1    | 0     | gyrA-87Y | R | R | 15    | yes | no  | R271       |
| 30164  | OUCRU | yes | HCMC      | 2009 | 112.6 | III | sweep4 | 1    | 0     | gyrA-87Y | R | R | 15    | yes | no  |            |
| 30162  | OUCRU | yes | HCMC      | 2009 | 139.5 | III | sweep4 | 1    | 0     | gyrA-87Y | R | R | 15    | yes | no  | R271       |
| 30124  | OUCRU | yes | HCMC      | 2009 | 31.8  | III | sweep4 | 1    | 0.25  | gyrA-87Y | R | R | 15    | yes | no  |            |
| 30112  | OUCRU | yes | HCMC      | 2009 | 38.3  | III | sweep4 | 1    | 1     | gyrA-87Y | R | R | 15    | yes | no  | R271, mini |
| 30100  | OUCRU | yes | HCMC      | 2009 | 224   | III | sweep4 | 1    | 0.92  | gyrA-87Y | R | R | 15    | yes | no  |            |
| 30071  | OUCRU | yes | HCMC      | 2009 | 133.1 | III | sweep4 | 1    | 0.901 | gyrA-87Y | R | R | 15    | yes | no  |            |
| 30059  | OUCRU | yes | HCMC      | 2009 | 152.9 | III | sweep4 | 1    | 0.765 | gyrA-87Y | R | R | 15    | yes | no  | R271       |
| 30054  | OUCRU | yes | HCMC      | 2009 | 88.9  | III | sweep4 | 1    | 0.584 | gyrA-87Y | R | R | 15    | yes | no  | R271       |
| 30037  | OUCRU | yes | HCMC      | 2009 | 155.4 | III | sweep4 | 1    | 0.843 | gyrA-87Y | R | R | 15    | yes | no  | R271       |
| 30008  | OUCRU | yes | HCMC      | 2009 | 42.4  | III | sweep4 | 1    | 0.58  | gyrA-87Y | R | R | 15    | yes | no  | R271       |

|       |       |     |      |      |       |     |        |   |       |          |   |   |    |     |    |             |
|-------|-------|-----|------|------|-------|-----|--------|---|-------|----------|---|---|----|-----|----|-------------|
| 20343 | OUCRU | yes | HCMC | 2009 | 106   | III | sweep4 | 1 | 0     | gyrA-87Y | R | R | 15 | yes | no | pRA1, novel |
| 20263 | OUCRU | yes | HCMC | 2009 | 127.1 | III | sweep4 | 1 | 0     | gyrA-87Y | R | R | 15 | yes | no | pHUSEC41-1  |
| 20228 | OUCRU | yes | HCMC | 2009 | 153.8 | III | sweep4 | 1 | 0.945 | gyrA-87Y | R | R | 15 | yes | no | R271, mini  |
| 20070 | OUCRU | yes | HCMC | 2009 | 101.6 | III | sweep4 | 1 | 0.715 | gyrA-87Y | R | R | 15 | yes | no | LF82        |
| 20037 | OUCRU | yes | HCMC | 2009 | 39.9  | III | sweep4 | 1 | 0.524 | gyrA-87Y | R | R | 15 | yes | no |             |
| 20023 | OUCRU | yes | HCMC | 2009 | 137.7 | III | sweep4 | 1 | 0.841 | gyrA-87Y | R | R | 15 | yes | no | min         |
| 20021 | OUCRU | yes | HCMC | 2009 | 145.6 | III | sweep4 | 1 | 0.776 | gyrA-87Y | R | R | 15 | yes | no |             |
| 20006 | OUCRU | yes | HCMC | 2009 | 152.8 | III | sweep4 | 1 | 0.991 | gyrA-87Y | R | R | 15 | yes | no |             |
| 10365 | OUCRU | yes | HCMC | 2010 | 59    | III | sweep4 | 1 | 0     | gyrA-87Y | R | R | 15 | yes | no |             |
| 10320 | OUCRU | yes | HCMC | 2010 | 104   | III | sweep4 | 1 | 0     | gyrA-87Y | R | R | 15 | yes | no |             |
| 10263 | OUCRU | yes | HCMC | 2009 | 125.2 | III | sweep4 | 1 | 0.374 | gyrA-87Y | R | R | 15 | yes | no |             |
| 10188 | OUCRU | yes | HCMC | 2009 | 26.2  | III | sweep4 | 1 | 0.801 | gyrA-87Y | R | R | 15 | yes | no |             |
| 10159 | OUCRU | yes | HCMC | 2009 | 114.1 | III | sweep4 | 1 | 0.369 | gyrA-87Y | R | R | 15 | yes | no |             |
| 10152 | OUCRU | yes | HCMC | 2009 | 22.7  | III | sweep4 | 1 | 0.222 | gyrA-87Y | R | R | 15 | yes | no |             |
| 10135 | OUCRU | yes | HCMC | 2009 | 23.1  | III | sweep4 | 1 | 0.158 | gyrA-87Y | R | R | 15 | yes | no |             |
| 10134 | OUCRU | yes | HCMC | 2009 | 14.6  | III | sweep4 | 1 | 0.151 | gyrA-87Y | R | R | 15 | yes | no |             |
| 10115 | OUCRU | yes | HCMC | 2009 | 9.4   | III | sweep4 | 1 | 0.098 | gyrA-87Y | R | R | 15 | yes | no |             |
| 10111 | OUCRU | yes | HCMC | 2009 | 12.9  | III | sweep4 | 1 | 0     | gyrA-87Y | R | R | 15 | yes | no |             |
| 10093 | OUCRU | yes | HCMC | 2009 | 66.3  | III | sweep4 | 1 | 0.159 | gyrA-87Y | R | R | 15 | yes | no |             |
| 10083 | OUCRU | yes | HCMC | 2009 | 47.6  | III | sweep4 | 1 | 0.245 | gyrA-87Y | R | R | 15 | yes | no |             |
| 10063 | OUCRU | yes | HCMC | 2009 | 30.4  | III | sweep4 | 1 | 0     | gyrA-87Y | R | R | 15 | yes | no |             |
| 10060 | OUCRU | yes | HCMC | 2009 | 16.2  | III | sweep4 | 1 | 0     | gyrA-87Y | R | R | 15 | yes | no |             |
| 10035 | OUCRU | yes | HCMC | 2009 | 33.7  | III | sweep4 | 1 | 0     | gyrA-87Y | R | R | 15 | yes | no |             |
| 10014 | OUCRU | yes | HCMC | 2009 | 13.1  | III | sweep4 | 1 | 0     | gyrA-87Y | R | R | 15 | yes | no |             |



**Table S2. Genera contributing >1% of accessory genes annotated by MG-RAST within the pan-genome of the *S. sonnei* VN clone.**

| <b>Genus</b>          | <b>Accessory genes</b> |
|-----------------------|------------------------|
| <i>Escherichia</i>    | 46.8%                  |
| <i>Salmonella</i>     | 9.2%                   |
| <i>Shigella</i>       | 7.4%                   |
| <i>Yersinia</i>       | 6.7%                   |
| <i>Klebsiella</i>     | 2.3%                   |
| <i>Citrobacter</i>    | 2.2%                   |
| <i>Aeromonas</i>      | 2.0%                   |
| <i>Vibrio</i>         | 2.0%                   |
| <i>Photobacterium</i> | 1.3%                   |
| <i>Serratia</i>       | 1.2%                   |
| <i>Enterobacter</i>   | 1.1%                   |
| <i>Pseudomonas</i>    | 1.0%                   |
| Other                 | 16.6%                  |

**Table S3. Genes displaying evidence of convergent evolution**

Convergent evolution defined as independent mutations in phylogenetically distinct backgrounds resulting in changes to identical or neighbouring amino acids or diversifying selection (a higher rate of non-synonymous mutations over synonymous mutations, dN/dS>1.5).

| Gene ID   | Nonsynonymous SNPs | Synonymous SNPs | dN/dS | Homoplasic SNPs | Gene symbol | Product                                                  | Function                 | Note                                            |
|-----------|--------------------|-----------------|-------|-----------------|-------------|----------------------------------------------------------|--------------------------|-------------------------------------------------|
| SSON_2289 | 3                  | 0               | Inf   | 1               | gyrA        | DNA gyrase subunit A                                     | antimicrobial resistance | resistance to quinolone-based antimicrobials    |
| SSON_3392 | 4                  | 0               | Inf   | 0               | mreB        | rod shape-determining protein                            | antimicrobial resistance | mecillinam resistance; cell envelope            |
| SSON_2743 | 1                  | 0               | Inf   | 1               | smpB        | SsrA-binding protein                                     | antimicrobial resistance | aminoglycoside resistance                       |
| SSON_0691 | 4                  | 0               | Inf   | 0               | tolA        | cell envelope integrity inner membrane protein           | colicin sensitivity      | colicin interation; cell envelope               |
| SSON_0836 | 5                  | 1               | 1.54  | 0               | nfsA        | nitroreductase A                                         | metal resistance         | chromium tolerance                              |
| SSON_0131 | 3                  | 0               | Inf   | 1               | yacK        | multicopper oxidase                                      | metal resistance         | copper detoxification                           |
| SSON_3707 | 1                  | 0               | Inf   | 1               | zntA        | zinc/cadmium/mercury/lead-transporting ATPase            | metal resistance         | -                                               |
| SSON_2085 | 1                  | 0               | Inf   | 1               | yeeY        | putative transcriptional regulator<br>LYSR-type          | regulator                | transcriptional regulator, unknown function     |
| SSON_2224 | 1                  | 0               | Inf   | 1               | fruK        | 1-phosphofructokinase                                    | starvation response      | carbon metabolism                               |
| SSON_0087 | 1                  | 0               | Inf   | 1               | fruR        | DNA-binding transcriptional regulator                    | starvation response      | regulation of carbon usage pathways             |
| SSON_0935 | 4                  | 0               | Inf   | 0               | pepN        | aminopeptidase N                                         | starvation response      | response to phosphate starvation                |
| SSON_4271 | 2                  | 0               | Inf   | 1               | phnM        | phosphonate metabolism                                   | starvation response      | -                                               |
| SSON_0891 | 1                  | 1               | 0.31  | 1               | ftsK        | DNA translocase                                          | stress response          | stress response                                 |
| SSON_0979 | 4                  | 1               | 1.23  | 0               | hyaB        | hydrogenase 1 large subunit                              | stress response          | acid tolerance                                  |
| SSON_0646 | 4                  | 2               | 0.62  | 0               | kdpD        | sensor protein                                           | stress response          | response to osmotic shock                       |
| SSON_0857 | 3                  | 0               | Inf   | 1               | poxB        | pyruvate dehydrogenase                                   | stress response          | rpoS regulated; response to chemicals           |
| SSON_2889 | 5                  | 2               | 0.77  | 0               | rpoS        | RNA polymerase sigma factor                              | stress response          | master regulator of the general stress response |
| SSON_3060 | 5                  | 0               | Inf   | 0               | ubiH        | 2-octaprenyl-6-methoxyphenyl hydroxylase                 | stress response          | response to oxidative stress                    |
| SSON_0788 | 1                  | 0               | Inf   | 1               | ybiO        | hypothetical protein                                     | stress response          | rpoS regulated transporter                      |
| SSON_2853 | 2                  | 1               | 0.617 | 1               | ygaA        | anaerobic nitric oxide reductase transcription regulator | stress response          | response to reactive nitrogen species           |
| SSON_1122 | 4                  | 1               | 1.23  | 0               | fhuE        | ferric-rhodotorulic acid outer                           | transporter              | iron acquisition                                |

|           |   |   |      |   |      |                                                         |                       |                                                         |
|-----------|---|---|------|---|------|---------------------------------------------------------|-----------------------|---------------------------------------------------------|
| SSON_2575 | 1 | 0 | Inf  | 1 | perM | membrane transporter<br>putative permease               | transporter           | inner membrane transport                                |
| SSON_3332 | 3 | 0 | Inf  | 1 | yhbE | hypothetical protein                                    | transporter           | -                                                       |
| SSON_0773 | 3 | 0 | Inf  | 1 | ybhF | putative ATP-binding component of<br>a transport system | transporter           | -                                                       |
| SSON_3441 | 4 | 0 | Inf  | 0 | secY | preprotein translocase subunit                          | type II secretion     | type II secretion                                       |
| SSON_4063 | 4 | 0 | Inf  | 0 | fdoG | formate dehydrogenase-O <sub>2</sub> major<br>subunit   | anaerobic respiration | anaerobic respiration                                   |
| SSON_2567 | 1 | 1 | 0.31 | 1 | hyfF | hydrogenase 4 subunit F                                 | anaerobic respiration | anaerobic respiration                                   |
| SSON_3022 | 2 | 0 | Inf  | 1 | ygeX | diaminopropionate ammonia-lyase                         | metabolism            | -                                                       |
| SSON_4426 | 1 | 0 | Inf  | 1 | pyrB | aspartate carbamoyltransferase<br>catalytic subunit     | DNA metabolism        | -                                                       |
| SSON_3017 | 1 | 1 | 0.31 | 1 | xdhA | xanthine dehydrogenase subunit                          | DNA metabolism        | -                                                       |
| SSON_3100 | 4 | 1 | 1.23 | 0 | rsmE | 16S ribosomal RNA<br>methyltransferase                  | RNA modification      | RNA modification                                        |
| SSON_2196 | 1 | 0 | Inf  | 1 | yohI | tRNA-dihydrouridine synthase C                          | RNA modification      | RNA modification                                        |
| SSON_2555 | 3 | 2 | 0.46 | 1 | ypfI | hypothetical protein                                    | RNA modification      | RNA modification                                        |
| SSON_0033 | 2 | 0 | Inf  | 1 | fkpB | FKBX-type 16KD peptidyl-prolyl<br>cis-trans isomerase   | repair                | protein repair                                          |
| SSON_0374 | 4 | 1 | 1.23 | 0 | sbcC | exonuclease subunit                                     | repair                | phage resistance; DNA<br>repair                         |
| SSON_2310 | 1 | 0 | Inf  | 1 |      | competence damage-inducible<br>protein A                | repair                | damage-inducible protein                                |
| SSON_4205 | 1 | 0 | Inf  | 1 | yjbF | hypothetical protein                                    | Unknown               | extracellular<br>polysaccharide<br>biosynthetic process |
| SSON_0550 | 2 | 0 | Inf  | 1 | ybdD | hypothetical protein                                    | Unknown               | -                                                       |
| SSON_2657 | 0 | 2 | 0    | 1 |      | hypothetical protein                                    | Unknown               | -                                                       |

## References

1. Vinh, H. *et al.* A multi-center randomized trial to assess the efficacy of gatifloxacin versus ciprofloxacin for the treatment of shigellosis in Vietnamese children. *PLoS Negl Trop Dis* **5**, e1264 (2011).
2. Vinh, H. *et al.* A changing picture of shigellosis in southern Vietnam: shifting species dominance, antimicrobial susceptibility and clinical presentation. *BMC Infect Dis* **9**, 204 (2009).
3. Vinh, H. *et al.* Treatment of bacillary dysentery in Vietnamese children: two doses of ofloxacin versus 5-days nalidixic acid. *Trans Royal Soc Trop Med Hyg* **94**, 323-6 (2000).
4. Thompson, C.N. *et al.* Epidemiological features and risk factors of Salmonella gastroenteritis in children resident in Ho Chi Minh City, Vietnam. *Epidemiol Infect*, 1-10 (2012).
5. von Seidlein, L. *et al.* A multicentre study of Shigella diarrhoea in six Asian countries: disease burden, clinical manifestations, and microbiology. *PLoS Med* **3**, e353 (2006).
6. Holt, K. *et al.* Shigella sonnei genome sequencing and phylogenetic analysis indicate recent global dissemination from Europe. *Nat Genet* **44**, 1056-9 (2012).
7. Nguyen, N.T. *et al.* The sudden dominance of blaCTX-M harbouring plasmids in Shigella spp. Circulating in Southern Vietnam. *PLoS Negl Trop Dis* **4**, e702 (2010).
8. Woodford, N. *et al.* Complete nucleotide sequences of plasmids pEK204, pEK499, and pEK516, encoding CTX-M enzymes in three major Escherichia

- coli lineages from the United Kingdom, all belonging to the international O25:H4-ST131 clone. *Antimicrob Agents Chemother* **53**, 4472-82 (2009).
9. Cascales, E. *et al.* Colicin biology. *Microbiol Mol Biol Rev* **71**, 158-229 (2007).
  10. Lau, P.C. & Condie, J.A. Nucleotide sequences from the colicin E5, E6 and E9 operons: presence of a degenerate transposon-like structure in the ColE9-J plasmid. *Mol General Genet* **217**, 269-77 (1989).
